# Supplementary material
Source: bioRxiv or medRxiv preprint supplement (https://medrxiv.org/highwire/filestream/79087/field_highwire_adjunct_files/0/2020.04.28.20082750-1.pdf)
Supplement: Supplementary file [file 2020.04.28.20082750-1.pdf]

# **Technical Appendix: Transmission dynamics of coronavirus disease 2019 outside of Daegu-Gyeongsanbuk region in South Korea**

## **Contents:**

1. Appendix Figures
2. Appendix Tables

# 1. Appendix Figures

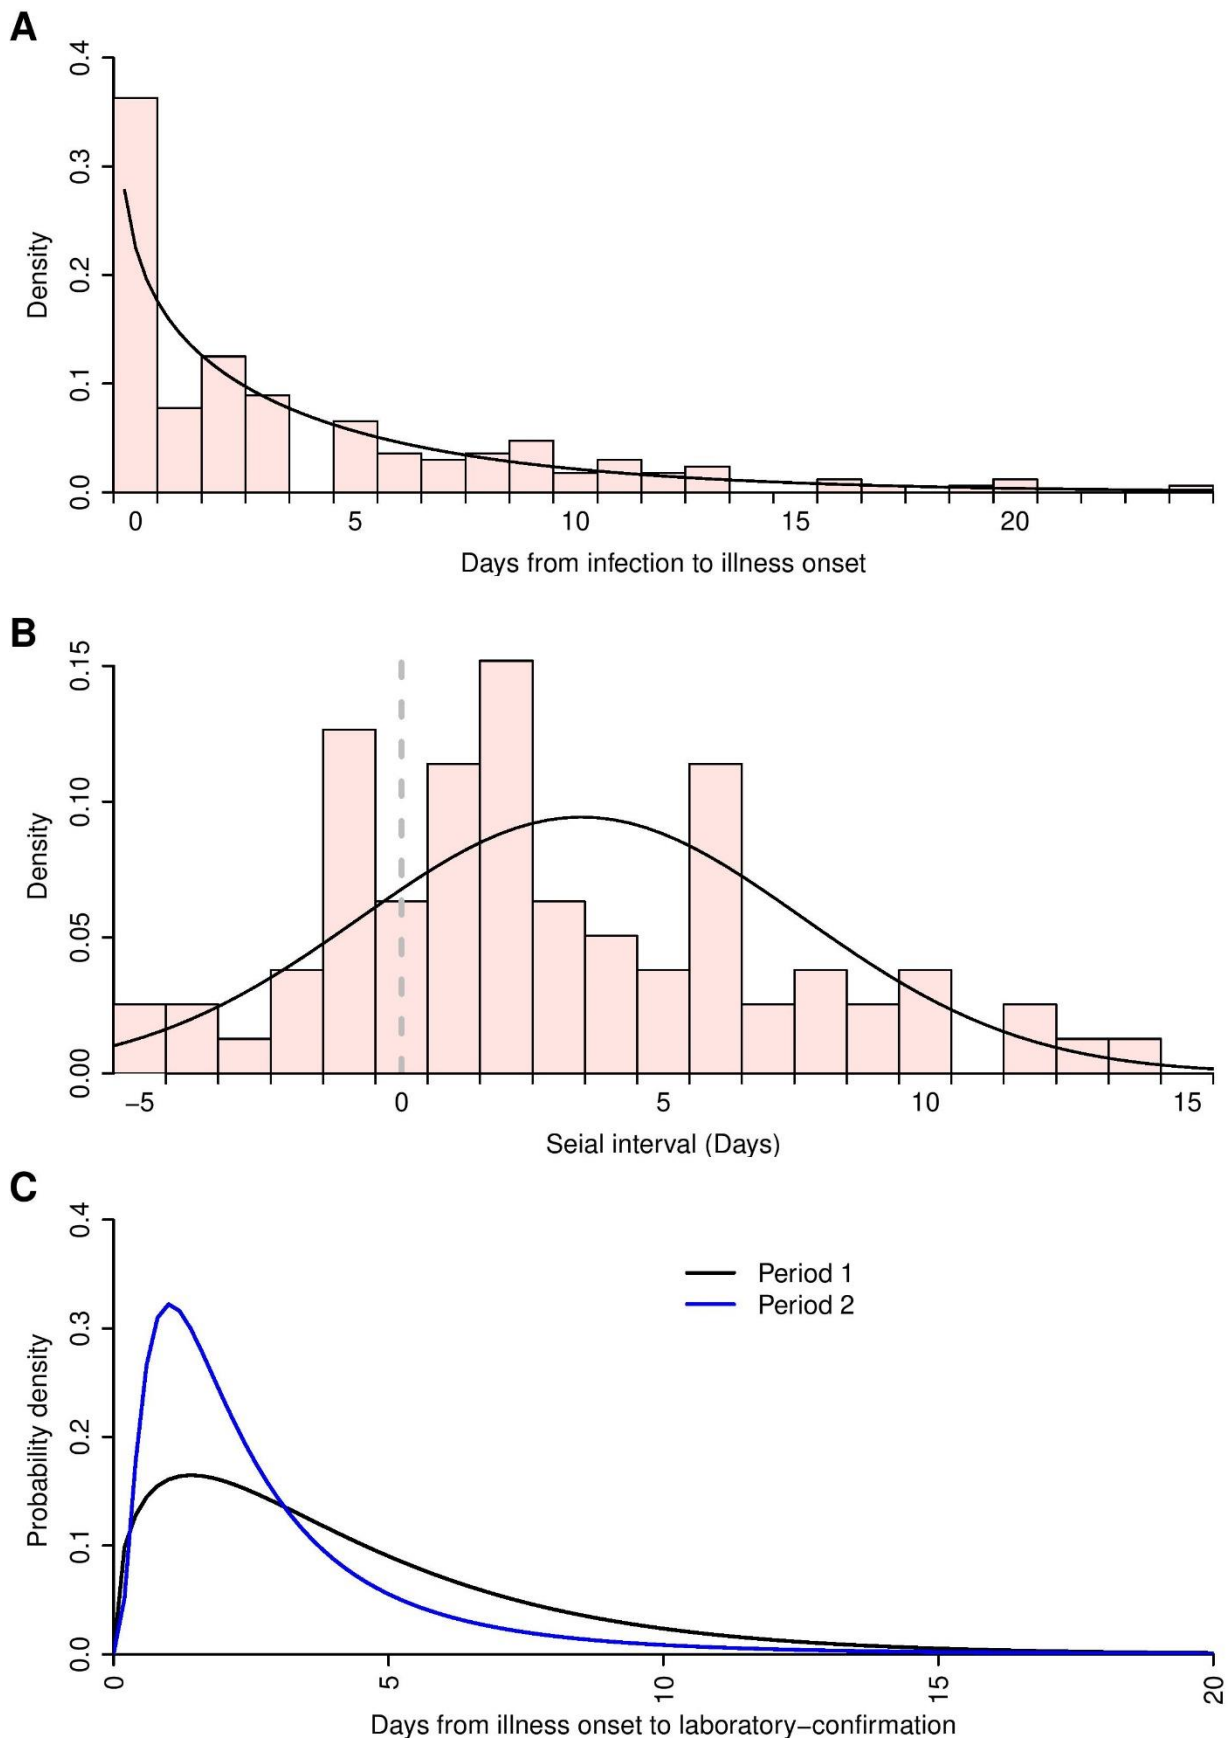

Appendix Figure 1. Estimates of epidemiological distributions, COVID-19, South Korea. (A) Distribution of incubation period among 181 laboratory-confirmed cases. The line is best fitted by a gamma distribution. (B) Distribution of serial interval among 79 cases in 44 clusters. The line indicates a fitted normal distribution. (C) Distribution of symptom onset to laboratory-confirmation divided by two periods of the epidemic in South Korea. The black line is the estimate during period-1 (before February 23, 2020), and the blue line is the estimate during period-2 (on or after February 24, 2020). Both lines indicate a fitted log-normal distribution.

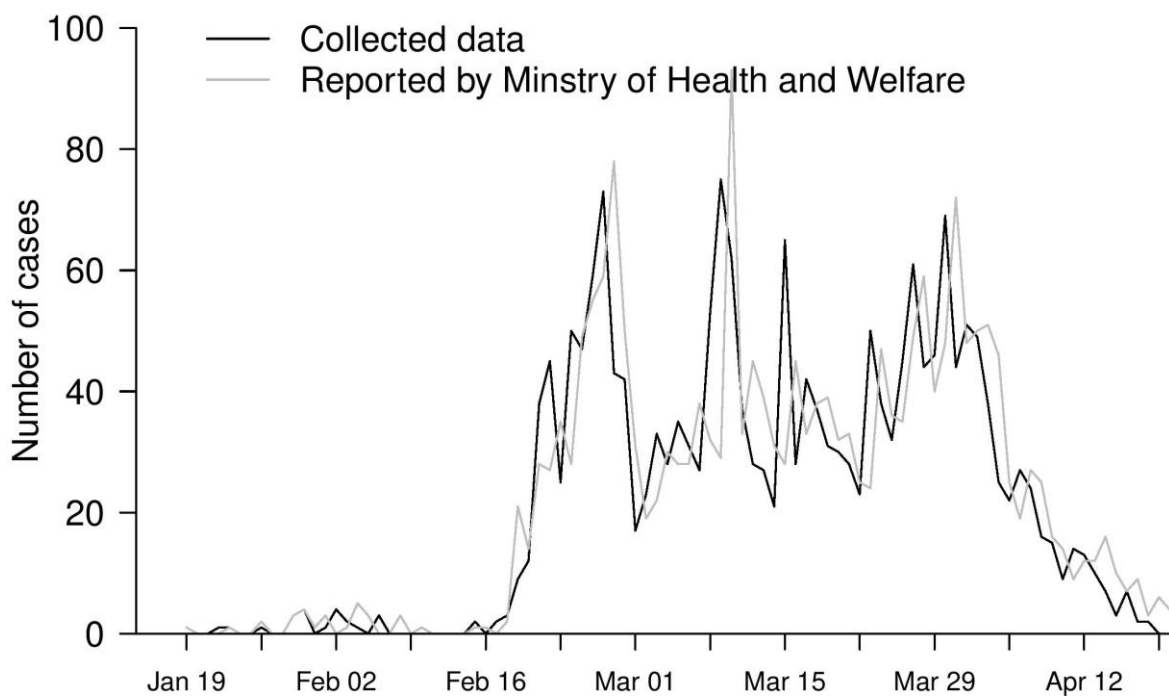

Appendix Figure 2. Daily number of laboratory-confirmed cases from the collected data and reported data by the Korean Ministry of Health and Welfare outside of Daegu-Gyeongsangbuk provincial region in South Korea. The black line indicates the collected data used in this study, and the gray line indicates the daily number of confirmed cases reported from the central government in South Korea.

## 2. Appendix Tables

Appendix Table 1. The dates of symptom onset among 79 cases in 44 clusters of infection.

| Number of cluster | Index case | Symptom onset     | Sex    | Age | Source ID from local public health authorities | Number of cluster | Index case | Symptom onset     | Sex    | Age | Source ID from local public health authorities |
|-------------------|------------|-------------------|--------|-----|------------------------------------------------|-------------------|------------|-------------------|--------|-----|------------------------------------------------|
| 1                 | 1          | February 18, 2020 | Female | 26  | Busan #11                                      | 13                | 0          | March 6, 2020     | Male   | 65  | Seoul #117                                     |
| 1                 | 0          | February 19, 2020 | Male   | 29  | Busan #39                                      | 14                | 1          | March 12, 2020    | Male   | 26  | Seoul #266                                     |
| 1                 | 0          | February 23, 2020 | Female | 32  | Busan #56                                      | 14                | 0          | March 19, 2020    | Female | 29  | Seoul #297                                     |
| 2                 | 1          | February 21, 2020 | Female | 57  | Busan #2                                       | 14                | 0          | March 18, 2020    | Female | 55  | Seoul #298                                     |
| 2                 | 0          | February 20, 2020 | Female | 25  | Busan #5                                       | 15                | 1          | March 11, 2020    | Female | 30  | Ulsan #29                                      |
| 2                 | 0          | February 21, 2020 | Female | 82  | Busan #6                                       | 15                | 0          | March 12, 2020    | Male   | 30  | Ulsan #30                                      |
| 2                 | 0          | February 22, 2020 | Female | 44  | Busan #25                                      | 16                | 1          | March 16, 2020    | Female | 30  | Ulsan #31                                      |
| 2                 | 0          | February 29, 2020 | Female | 83  | Busan #87                                      | 16                | 0          | March 16, 2020    | Male   | 30  | Ulsan #36                                      |
| 3                 | 1          | February 21, 2020 | Male   | 19  | Busan #15                                      | 17                | 1          | March 17, 2020    | Female | 26  | Seoul #304                                     |
| 3                 | 0          | February 26, 2020 | Male   | 16  | Busan #62                                      | 17                | 0          | March 20, 2020    | Male   | 61  | Seoul #320                                     |
| 3                 | 0          | February 28, 2020 | Male   | 19  | Busan #82                                      | 18                | 1          | March 19, 2020    | Female | 4   | Seoul #311                                     |
| 4                 | 1          | February 21, 2020 | Female | 25  | Busan #59                                      | 18                | 0          | March 22, 2020    | Female | 38  | Seoul #314                                     |
| 4                 | 0          | February 26, 2020 | Male   | 25  | Busan #65                                      | 19                | 1          | February 27, 2020 | Female | 55  | Suwon #13                                      |
| 4                 | 0          | February 24, 2020 | Female | 51  | Busan #58                                      | 19                | 0          | February 29, 2020 | Male   | 42  | Suwon #16                                      |
| 5                 | 1          | February 17, 2020 | Male   | 25  | Busan #13                                      | 20                | 1          | March 7, 2020     | Male   | 24  | Suwon #17                                      |
| 5                 | 0          | February 20, 2020 | Female | 56  | Busan #20                                      | 20                | 0          | March 9, 2020     | Male   | 10  | Suwon #18                                      |
| 6                 | 1          | February 22, 2020 | Female | 62  | Busan #78                                      | 21                | 1          | March 20, 2020    | Male   | 20s | Suwon #23                                      |
| 6                 | 0          | March 1, 2020     | Female | 36  | Busan #81                                      | 21                | 0          | March 22, 2020    | Male   | 50s | Suwon #24                                      |
| 7                 | 1          | February 17, 2020 | Female | 28  | Busan #36                                      | 21                | 0          | March 22, 2020    | Female | 20s | Suwon #26                                      |
| 7                 | 0          | February 23, 2020 | Male   | 27  | Busan #54                                      | 22                | 1          | March 27, 2020    | Female | 55  | Suwon #44                                      |
| 7                 | 0          | February 26, 2020 | Female | 18  | Busan #70                                      | 22                | 0          | March 31, 2020    | Male   | 42  | Suwon #45                                      |
| 7                 | 0          | March 2, 2020     | Female | 40  | Busan #85                                      | 23                | 1          | March 21, 2020    | Female | 30  | Yongin #41                                     |
| 8                 | 1          | February 28, 2020 | Male   | 79  | Busan #71                                      | 23                | 0          | March 22, 2020    | Male   | 57  | Yongin #43                                     |
| 8                 | 0          | March 9, 2020     | Male   | 50  | Busan #92                                      | 24                | 1          | March 14, 2020    | Male   | 49  | Yongin #29                                     |
| 8                 | 0          | March 12, 2020    | Male   | 50  | Busan #98                                      | 24                | 0          | March 19, 2020    | Female | 49  | Yongin #27                                     |
| 9                 | 1          | March 6, 2020     | Female | 68  | Busan #100                                     | 24                | 0          | March 27, 2020    | Female | 77  | Yongin #47                                     |
| 9                 | 0          | March 9, 2020     | Male   | 73  | Busan #97                                      | 25                | 1          | March 20, 2020    | Female | 68  | Yongin #34                                     |
| 10                | 1          | February 19, 2020 | Male   | 25  | Busan #57                                      | 25                | 0          | March 21, 2020    | Male   | 44  | Yongin #35                                     |
| 10                | 0          | February 23, 2020 | Female | 65  | Busan #60                                      | 25                | 0          | March 26, 2020    | Female | 44  | Yongin #44                                     |
| 11                | 1          | February 6, 2020  | Female | 82  | Seoul #14                                      | 26                | 1          | March 25, 2020    |        | 20s | Uijeongbu #18                                  |
| 11                | 0          | February 15, 2020 | Male   | 82  | Seoul #13                                      | 26                | 0          | March 30, 2020    |        | 20s | Uijeongbu #19                                  |
| 12                | 1          | February 27, 2020 | Female | 42  | Seoul #140                                     | 26                | 0          | April 1, 2020     |        | 50s | Uijeongbu #22                                  |
| 12                | 0          | February 29, 2020 | Female | 61  | Seoul #164                                     | 27                | 1          | February 20, 2020 | Female | 40s | Sejong #2                                      |
| 13                | 1          | February 24, 2020 | Female | 60  | Seoul #38                                      | 27                | 0          | February 22, 2020 | Female | 40s | Sejong #6                                      |
| Number of cluster | Index case | Symptom onset     | Sex    | Age | Source ID from local public health authorities | Number of cluster | Index case | Symptom onset     | Sex    | Age | Source ID from local public health authorities |

| cluster | case |                   |        |     | health authorities | cluster | case |                   |        |     | health authorities |
|---------|------|-------------------|--------|-----|--------------------|---------|------|-------------------|--------|-----|--------------------|
| 27      | 0    | February 27, 2020 | Female | 20s | Sejong #3          | 37      | 0    | March 3, 2020     | Female | 73  | Ansan #3           |
| 27      | 0    | February 22, 2020 | Female | 50s | Sejong #4          | 38      | 1    | March 3, 2020     | Female | 48  | Gwangmyeong #2     |
| 27      | 0    | March 1, 2020     | Female | 40s | Sejong #5          | 38      | 0    | February 28 2020  | Male   | 49s | Gwangmyeong #3     |
| 28      | 1    | February 21, 2020 | Female | 47  | Gyeongnam #5       | 38      | 0    | March 2, 2020     | Male   | 11  | Gwangmyeong #4     |
| 28      | 0    | February 18, 2020 | Male   | 21  | Gyeongnam #7       | 39      | 1    | February 18, 2020 | Male   | 36  | Chungbuk #2        |
| 28      | 0    | February 24, 2020 | Male   | 16  | Gyeongnam #29      | 39      | 0    | February 18, 2020 | Female | 35  | Chungbuk #3        |
| 28      | 0    | February 25, 2020 | Male   | 41  | Gyeongnam #42      | 39      | 0    | March 4, 2020     | Female | 57  | Chungbuk #14       |
| 29      | 1    | April 2, 2020     | Female | 39  | Gyeongnam #109     | 40      | 1    | March 8, 2020     | Female | 42  | Chungnam #107      |
| 29      | 0    | April 4, 2020     | Male   | 9   | Gyeongnam #110     | 40      | 0    | March 6, 2020     | Male   | 1   | Chungnam #108      |
| 30      | 1    | February 23, 2020 | Female | 72  | Namyangju #2       | 41      | 1    | March 6, 2020     | Male   | 38  | Chungnam #94       |
| 30      | 0    | February 23, 2020 | Male   | 77  | Namyangju #3       | 41      | 0    | March 6, 2020     | Female | 32  | Chungnam #95       |
| 31      | 1    | March 28, 2020    | Female | 20s | Jeju #9            | 41      | 0    | March 6, 2020     | Female | 3   | Chungnam #96       |
| 31      | 0    | April 1, 2020     | Male   | 30s | Jeju #11           | 42      | 1    | April 7, 2020     | Female | 42  | Seongnam #120      |
| 32      | 1    | April 9, 2020     | Male   | 60s | Guri #5            | 42      | 0    | April 10, 2020    | Male   | 1   | Seongnam #122      |
| 32      | 0    | April 6, 2020     | Female | 61  | Pocheon #12        | 43      | 1    | February 21, 2020 | Male   | 21  | Busan #29          |
| 32      | 0    | April 12, 2020    | Female | 60s | Pocheon #14        | 43      | 0    | February 24, 2020 | Male   | 19  | Busan #42          |
| 33      | 1    | March 23, 2020    | Female | 46  | Pyeongtaek #19     | 43      | 0    | February 21, 2020 | Female | 51  | Busan #43          |
| 33      | 0    | March 22, 2020    | Female | 78  | Pyeongtaek #26     | 44      | 1    | February 21, 2020 | Female | 25  | Busan #59          |
| 33      | 0    | March 25, 2020    | Male   | 79  | Pyeongtaek #27     | 44      | 0    | February 24, 2020 | Female | 51  | Busan #58          |
| 33      | 0    | March 23, 2020    | Female | 34  | Pyeongtaek #28     | 44      | 0    | February 21, 2020 | Female | 44  | Busan #61          |
| 33      | 0    | March 26, 2020    | Female | 32  | Pyeongtaek #29     | 44      | 0    | February 28, 2020 | Female | 31  | Busan #63          |
| 33      | 0    | April 3, 2020     | Male   | 47  | Pyeongtaek #35     |         |      |                   |        |     |                    |
| 33      | 0    | April 6, 2020     | Male   | 54  | Pyeongtaek #38     |         |      |                   |        |     |                    |
| 34      | 1    | March 25, 2020    | Male   | 9   | Pyeongtaek #36     |         |      |                   |        |     |                    |
| 34      | 0    | March 19, 2020    | Female | 49  | Pyeongtaek #39     |         |      |                   |        |     |                    |
| 35      | 1    | February 24, 2020 | Female | 40s | Gwangmyeong #2     |         |      |                   |        |     |                    |
| 35      | 0    | February 28, 2020 | Male   | 49  | Gwangmyeong #3     |         |      |                   |        |     |                    |
| 35      | 0    | March 2, 2020     | Male   | 11  | Gwangmyeong #4     |         |      |                   |        |     |                    |
| 36      | 1    | April 6, 2020     |        | 60s | Uijeongbu #28      |         |      |                   |        |     |                    |
| 36      | 0    | April 6, 2020     |        | 60s | Uijeongbu #29      |         |      |                   |        |     |                    |
| 36      | 0    | April 9, 2020     | Male   | 60  | Gwangju #15        |         |      |                   |        |     |                    |
| 36      | 0    | April 9, 2020     | Female | 56  | Gwangju #16        |         |      |                   |        |     |                    |
| 37      | 1    | February 25, 2020 | Female | 49  | Gunpo #2           |         |      |                   |        |     |                    |
| 37      | 0    | March 3, 2020     | Male   | 78  | Ansan #1           |         |      |                   |        |     |                    |

Appendix Table 2. Key non-pharmaceutical interventions in South Korea (most of the interventions)

| Starting date                  | Interventions                                                         | Source                                                                                                                                                                                                                                                                                                                                                    |
|--------------------------------|-----------------------------------------------------------------------|-----------------------------------------------------------------------------------------------------------------------------------------------------------------------------------------------------------------------------------------------------------------------------------------------------------------------------------------------------------|
| <b>Travel related measures</b> |                                                                       |                                                                                                                                                                                                                                                                                                                                                           |
| February 3, 2020               | Barred of entry of foreign travelers from Hubei province, China       | <a href="http://overseas.mofa.go.kr/ru-ko/brd/m_7329/view.do?seq=1345588&amp;srchFr=&amp;srchTo=&amp;srchWord=&amp;srchTp=&amp;multi_itm_seq=0&amp;itm_seq_1=0&amp;itm_seq_2=0">http://overseas.mofa.go.kr/ru-ko/brd/m_7329/view.do?seq=1345588&amp;srchFr=&amp;srchTo=&amp;srchWord=&amp;srchTp=&amp;multi_itm_seq=0&amp;itm_seq_1=0&amp;itm_seq_2=0</a> |
| February 23, 2020              | Recommnd travel restriction in Daegu City                             | <a href="http://ncov.mohw.go.kr/tcmBoardView.do?contSeq=353064">http://ncov.mohw.go.kr/tcmBoardView.do?contSeq=353064</a>                                                                                                                                                                                                                                 |
| March 9, 2020                  | Barred of entry of foreign travelers from Japan                       | <a href="http://overseas.mofa.go.kr/jp-ko/brd/m_1083/view.do?seq=1343492">http://overseas.mofa.go.kr/jp-ko/brd/m_1083/view.do?seq=1343492</a>                                                                                                                                                                                                             |
| April 1, 2020                  | Implmented 14-day mandatory quarantine for arriving Korea             | <a href="http://ncov.mohw.go.kr/tcmBoardView.do?brdId=&amp;brdGubun=&amp;dataGubun=&amp;ncvContSeq=353800&amp;contSeq=353800&amp;board_id=&amp;gubun=ALL">http://ncov.mohw.go.kr/tcmBoardView.do?brdId=&amp;brdGubun=&amp;dataGubun=&amp;ncvContSeq=353800&amp;contSeq=353800&amp;board_id=&amp;gubun=ALL</a>                                             |
| <b>Case-based measures</b>     |                                                                       |                                                                                                                                                                                                                                                                                                                                                           |
| February 17, 2020              | Implemented Nation-wide screening health care workers at nursing home | <a href="https://www.gov.kr/portal/ntnadmNews/2120440">https://www.gov.kr/portal/ntnadmNews/2120440</a>                                                                                                                                                                                                                                                   |
| February 23, 2020              | Operated Nation-wide drive through screening centers in operation     | <a href="https://jkms.org/DOIx.php?id=10.3346/jkms.2020.35.e123">https://jkms.org/DOIx.php?id=10.3346/jkms.2020.35.e123</a>                                                                                                                                                                                                                               |
| February 24, 2020              | Initiated screening all suspected cases in Daegu-city                 | <a href="http://ncov.mohw.go.kr/tcmBoardView.do?brdId=&amp;brdGubun=&amp;dataGubun=&amp;ncvContSeq=353081&amp;contSeq=353081&amp;board_id=&amp;gubun=ALL">http://ncov.mohw.go.kr/tcmBoardView.do?brdId=&amp;brdGubun=&amp;dataGubun=&amp;ncvContSeq=353081&amp;contSeq=353081&amp;board_id=&amp;gubun=ALL</a>                                             |
| February 25, 2020              | Initiated screening all Sincheonji religious group members            | <a href="http://www.korea.kr/news/pressReleaseView.do?newsId=156377318">http://www.korea.kr/news/pressReleaseView.do?newsId=156377318</a>                                                                                                                                                                                                                 |
| February 27, 2020              | Designated Nation-wide public relief hospital                         | <a href="http://ncov.mohw.go.kr/tcmBoardView.do?brdId=&amp;brdGubun=&amp;dataGubun=&amp;ncvContSeq=353184&amp;contSeq=353184&amp;board_id=140&amp;gubun=BDJ">http://ncov.mohw.go.kr/tcmBoardView.do?brdId=&amp;brdGubun=&amp;dataGubun=&amp;ncvContSeq=353184&amp;contSeq=353184&amp;board_id=140&amp;gubun=BDJ</a>                                       |
| March 9, 2020                  | Implemented Nation-wide screening elders at nursing home              | <a href="https://www.gov.kr/portal/ntnadmNews/2120440">https://www.gov.kr/portal/ntnadmNews/2120440</a>                                                                                                                                                                                                                                                   |
| <b>Community measures</b>      |                                                                       |                                                                                                                                                                                                                                                                                                                                                           |
| February 23, 2020              | Raised the infectious disease alert to the highest level              | <a href="https://www.cdc.go.kr/board/board.es?mid=a20501000000&amp;bid=0015&amp;act=view&amp;list_no=366324&amp;tag=&amp;nPage=1">https://www.cdc.go.kr/board/board.es?mid=a20501000000&amp;bid=0015&amp;act=view&amp;list_no=366324&amp;tag=&amp;nPage=1</a>                                                                                             |
| February 23, 2020              | Postponed school opening for new semester                             | <a href="https://www.moe.go.kr/boardCnts/view.do?boardID=294&amp;boardSeq=79829&amp;lev=0&amp;searchType=S&amp;statusYN=W&amp;page=1&amp;s=moe&amp;m=020402&amp;opType=N">https://www.moe.go.kr/boardCnts/view.do?boardID=294&amp;boardSeq=79829&amp;lev=0&amp;searchType=S&amp;statusYN=W&amp;page=1&amp;s=moe&amp;m=020402&amp;opType=N</a>             |

|                |                                        |                                                                                                                                                                                                                                                                                                                                                                                                                     |
|----------------|----------------------------------------|---------------------------------------------------------------------------------------------------------------------------------------------------------------------------------------------------------------------------------------------------------------------------------------------------------------------------------------------------------------------------------------------------------------------|
| March 9, 2020  | Distributed public face masks          | <a href="https://www.mfds.go.kr/brd/m_99/view.do?seq=44020&amp;srchFr=&amp;srchTo=&amp;srchWord=&amp;srchTp=&amp;itm_seq_1=0&amp;itm_seq_2=0&amp;multi_itm_seq=0&amp;company_cd=&amp;company_nm=&amp;page=1">https://www.mfds.go.kr/brd/m_99/view.do?seq=44020&amp;srchFr=&amp;srchTo=&amp;srchWord=&amp;srchTp=&amp;itm_seq_1=0&amp;itm_seq_2=0&amp;multi_itm_seq=0&amp;company_cd=&amp;company_nm=&amp;page=1</a> |
| March 22, 2020 | Implemented social distancing measures | <a href="http://ncov.mohw.go.kr/shBoardView.do?brdId=2&amp;brdGubun=27&amp;ncvContSeq=1385#">http://ncov.mohw.go.kr/shBoardView.do?brdId=2&amp;brdGubun=27&amp;ncvContSeq=1385#</a>                                                                                                                                                                                                                                 |
| April 20, 2020 | Softened social distancing measures    | <a href="http://www.mohw.go.kr/react/al/sal0301vw.jsp?PAR_MENU_ID=04&amp;MENU_ID=0403&amp;page=1&amp;CONT_SEQ=354112">http://www.mohw.go.kr/react/al/sal0301vw.jsp?PAR_MENU_ID=04&amp;MENU_ID=0403&amp;page=1&amp;CONT_SEQ=354112</a>                                                                                                                                                                               |
